# Supplementary material for: Employing Eu,Tb-doped HfO 2 nanocrystals as built-in cryogenic luminescent nanothermometers for commercial coated conductors
Source: Royal Society of Chemistry journal article supplement (doi:10.1039/d5tc02913a), 2025-12-15
Supplement: d5tc02913a1.pdf [file d5tc02913a1.pdf]

## Supporting Information of

# Employing Eu,Tb-doped HfO<sub>2</sub> nanocrystals as built-in cryogenic luminescent nanothermometer for commercial coated conductors

Pauline Rooms<sup>a</sup>, Mirijam Lederer<sup>b</sup>, Ian Pompermayer Machado<sup>b</sup>, Martina Tsvetanova<sup>c</sup>, Klaartje De Buyssera, Anna M. Kaczmarek<sup>b</sup>, and Hannes Rijckaerta

<sup>a</sup> SCRiPTS, Department of Chemistry, Ghent University, Krijgslaan 289-S3, 9000 Ghent, Belgium

<sup>b</sup> NanoSensing Group, Department of Chemistry, Ghent University, Krijgslaan 289-S3, 9000 Ghent, Belgium

<sup>c</sup> MESA+ Institute for Nanotechnology, Faculty of Science and Technology, University of Twente, Enschede 7500 AE, Netherlands

\*Correspondence: [Anna.Kaczmarek@UGent.be](mailto:Anna.Kaczmarek@UGent.be)

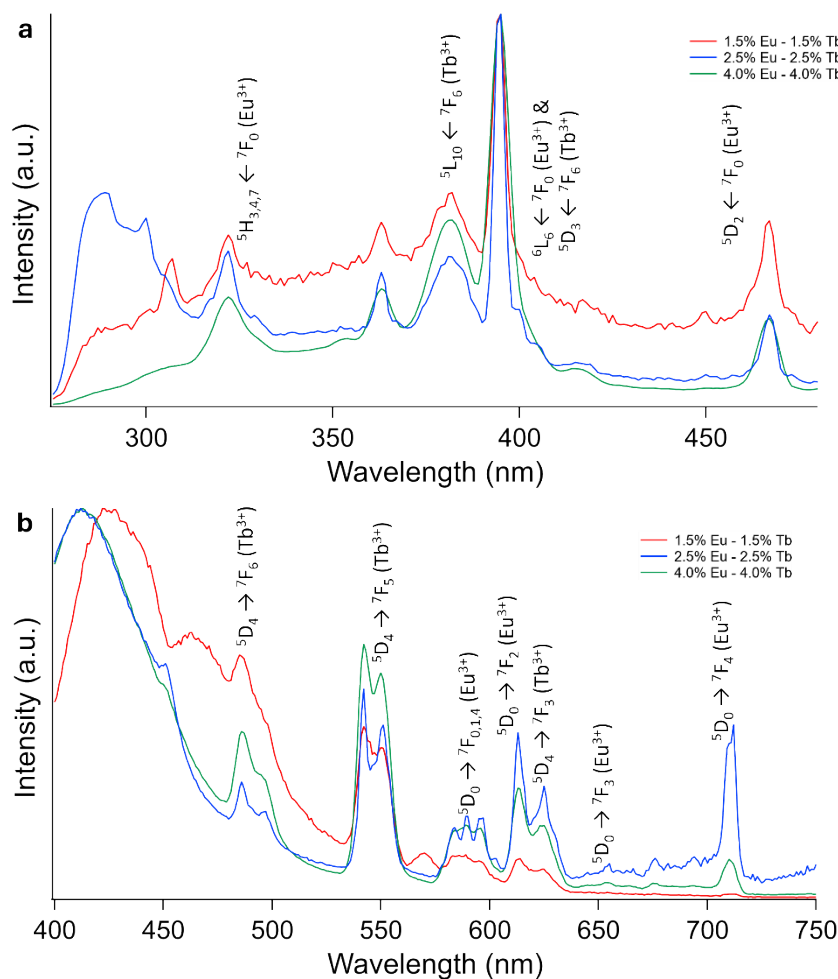

**Figure S1.** Comparison of normalized photoluminescence spectra of HfO<sub>2</sub>:Eu<sup>3+</sup>,Tb<sup>3+</sup> NCs with different doping percentages. Red: HfO<sub>2</sub>:1.5%Eu<sup>3+</sup>,1.5%Tb<sup>3+</sup>, blue: HfO<sub>2</sub>:2.5%Eu<sup>3+</sup>,2.5%Tb<sup>3+</sup> and green:

HfO<sub>2</sub>:4.0%Eu<sup>3+</sup>,4.0%Tb<sup>3+</sup> NCs. (a) Excitation spectrum ( $\lambda_{em}$  = 613 nm), and (b) emission spectrum ( $\lambda_{ex}$  = 285 nm). Comments on the spectral features are found in table S1.

**Table S1.** Overview of the screening process to determine the total doping percentage.

| Doping percentage Eu <sup>3+</sup> | Doping percentage Tb <sup>3+</sup> | Description of the emission spectrum                                                                                                                                                                                                                       |
|------------------------------------|------------------------------------|------------------------------------------------------------------------------------------------------------------------------------------------------------------------------------------------------------------------------------------------------------|
| 1.50                               | 1.50                               | As starting material, nanoparticles doped with 1.5% of each lanthanide were synthesized. This total doping percentage was not enough to produce f-f transitions peak with a good intensity compared to the broad band that is present around 400 - 475 nm. |
| 2.50                               | 2.50                               | The intensities of the f-f transition peaks to the intensity of the broad band was much better compared to 3% total doping. Moreover, compared to 3% total doping, there is no substantial reduction in decay time for 5% total doping percentage.         |
| 4.00                               | 4.00                               | The intensities of the f-f transition peaks to the intensity of the broad band is more or less same as the 5% total doping. Therefore, a final total doping percentage of 5% was chosen.                                                                   |

**Table S2.** Overview of the screening process to determine the ratio of the Eu<sup>3+</sup>/Tb<sup>3+</sup> ratio.

| Doping percentage Eu <sup>3+</sup> | Doping percentage Tb <sup>3+</sup> | Description of the emission spectrum                                                                                                                                                                                                                                  |
|------------------------------------|------------------------------------|-----------------------------------------------------------------------------------------------------------------------------------------------------------------------------------------------------------------------------------------------------------------------|
| 2.50                               | 2.50                               | As determined in the previous table, a total of 5% doping is best for this application. However, the Eu:Tb ratio was not optimal: the intensity of the Eu peaks were not strong enough compared to the Tb peaks.                                                      |
| 3.75                               | 1.25                               | The ratio of the Eu peaks compared to the Tb peaks was better at room temperature for this sample, however in the cryogenic region this doping ratio resulted in a thermometry system with poor $S_r$ values.                                                         |
| 4.50                               | 0.50                               | This ratio of the Eu peaks to the Tb peaks was excellent in this system. Furthermore, this doping ratio in the cryogenic region yielded a thermometry system with good $S_r$ values. Therefore, these doping percentages were chosen for this system and application. |

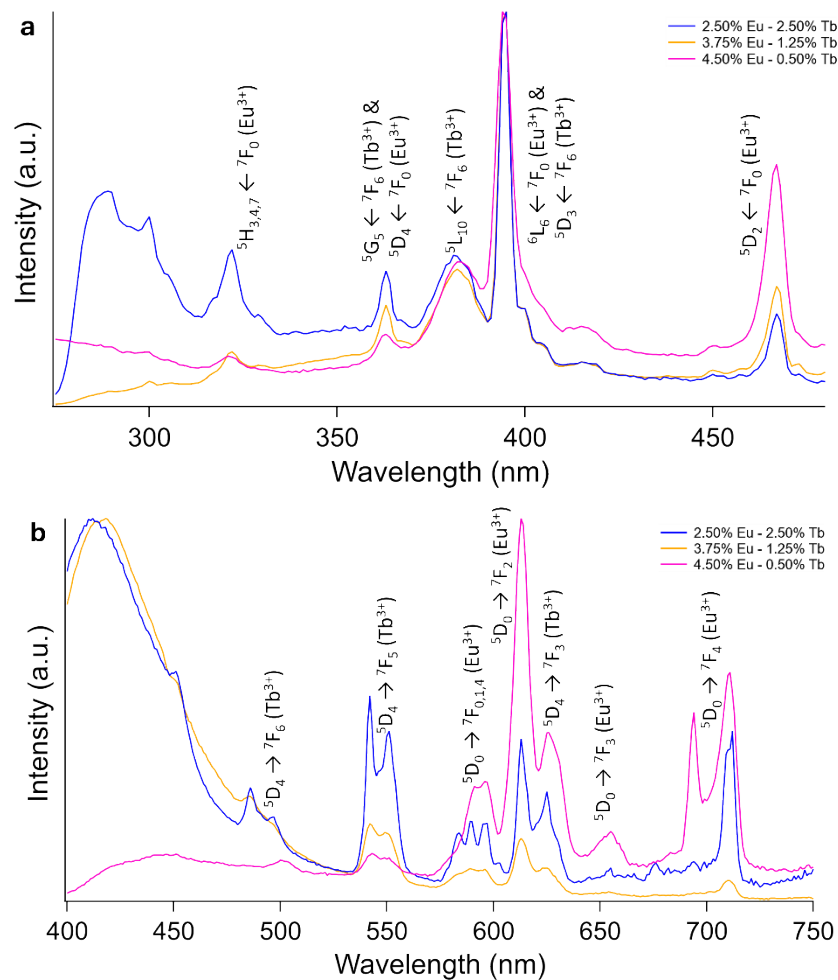

**Figure S2.** Comparison of normalized photoluminescence spectra of HfO<sub>2</sub>:Eu<sup>3+</sup>,Tb<sup>3+</sup> NCs with a total of 5% lanthanide doping, but different doping ratios. Blue: HfO<sub>2</sub>:2.5%Eu<sup>3+</sup>,2.5%Tb<sup>3+</sup>, orange: HfO<sub>2</sub>:3.75%Eu<sup>3+</sup>,1.25%Tb<sup>3+</sup> and pink: HfO<sub>2</sub>:4.5%Eu<sup>3+</sup>,0.5%Tb<sup>3+</sup> NCs. (a) Excitation spectrum (λ<sub>em</sub> = 613 nm), and (b) emission spectrum (λ<sub>ex</sub> = 285 nm). Comments on the spectral features are found in table S2.

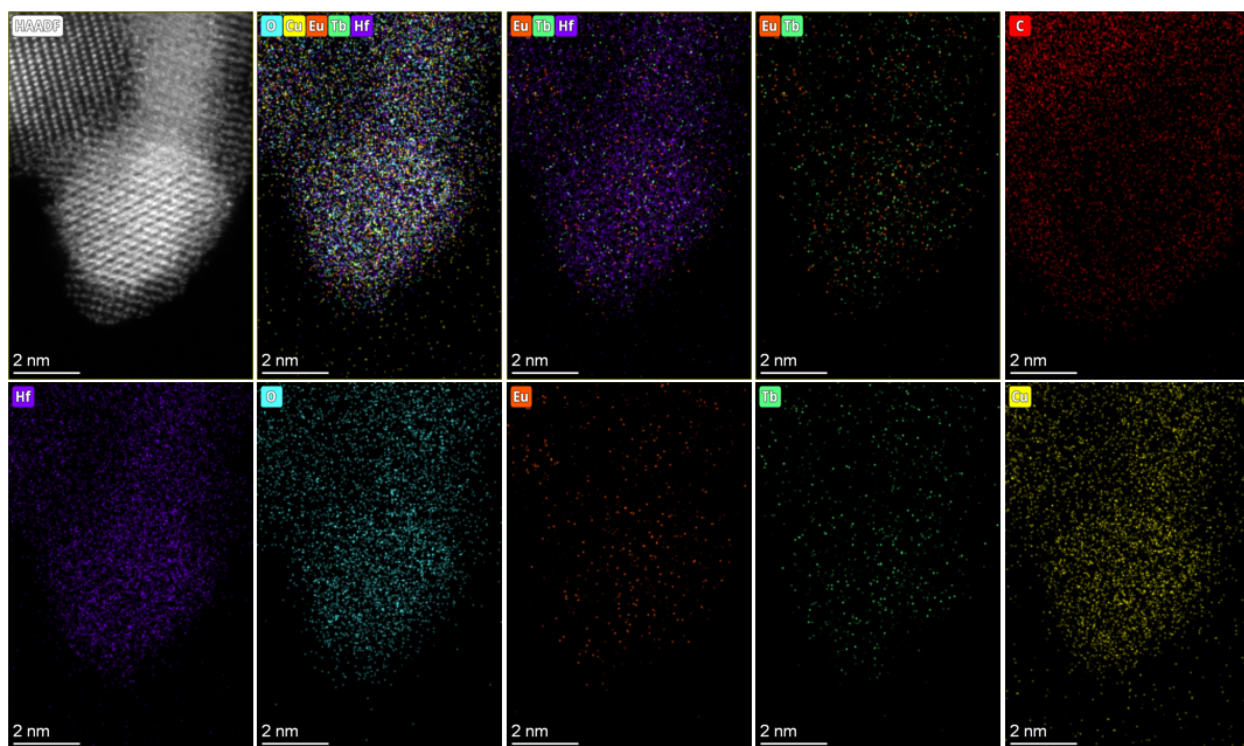

**Figure S3.** High-angle annular dark-field (HAADF)-scanning transmission electron microscopy (STEM) with corresponding energy-dispersive X-ray spectroscopy (EDX) compositional and element maps.

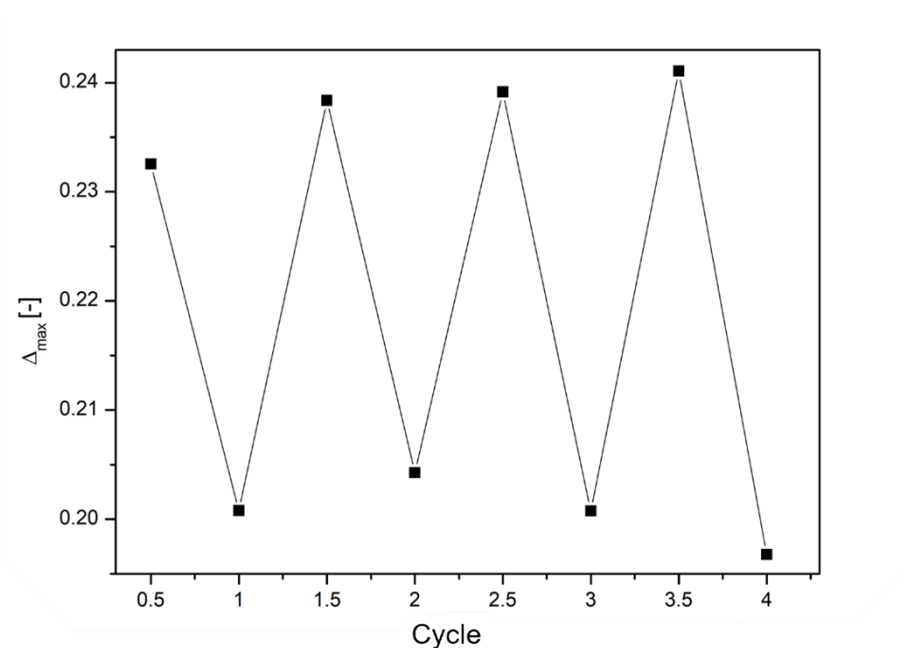

**Figure S4.** Cycle test of  $\text{HfO}_2:4.5\%\text{Eu}^{3+},0.5\%\text{Tb}^{3+}$  nanocrystals, measured between 40 K and 100 K with a step size of 10 K. A repeatability of 98% was determined using eq. 4.

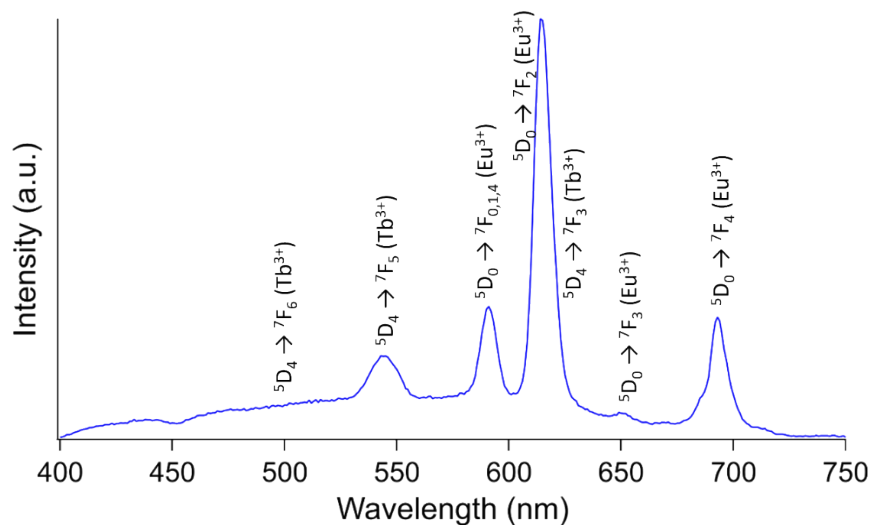

**Figure S5.** Emission spectrum of  $\text{HfO}_2:4.5\%\text{Eu}^{3+},0.5\%\text{Tb}^{3+}$  measured at RT as a thin film. The excitation wavelength is 250 nm.

The data of the film recorded at RT clearly shows the  $\text{Tb}^{3+}$  540 nm peak in a similar  $\text{Eu}^{3+}/\text{Tb}^{3+}$  ratio as in the powder. The peaks look a bit different and are embedded on a broad band, but that is due to it being a film.

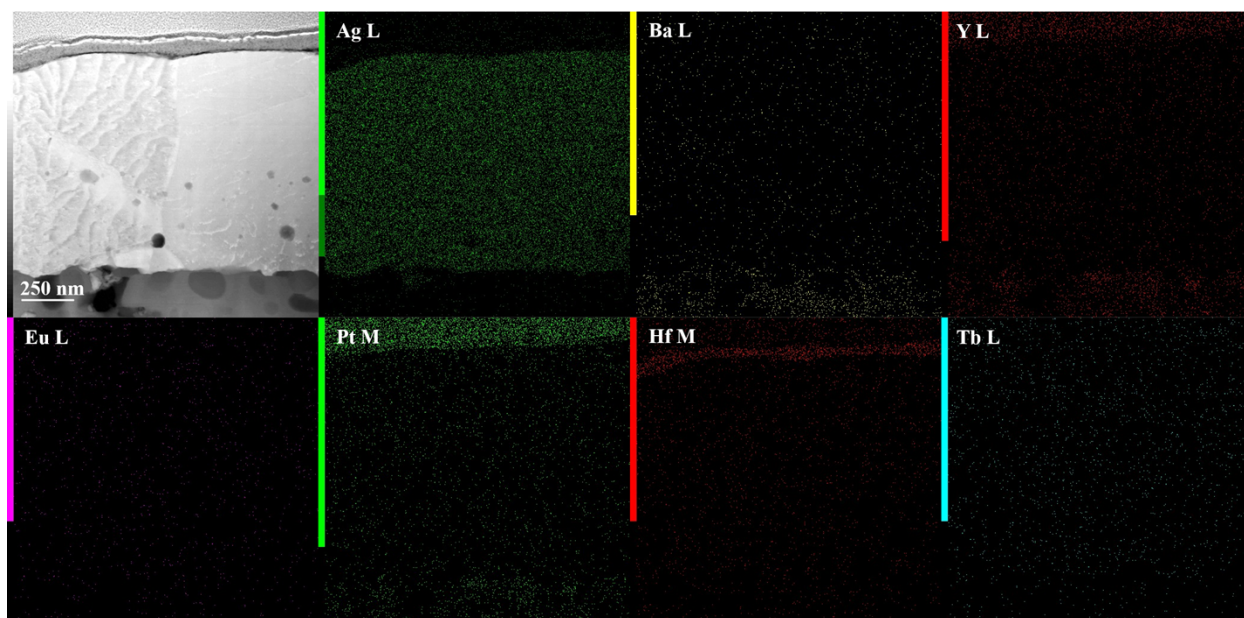

**Figure S6.** EDX compositional and element maps of a commercial YBCO tape with  $60\pm 10$  nm  $\text{HfO}_2:4.5\%\text{Eu}^{3+},0.5\%\text{Tb}^{3+}$  nanocrystals on the top of Ag protective layer at low magnification.
